# Supplementary material for: Au Clusters Supported on Defect-Rich Ni-Ti Oxides Derived from Ultrafine Layered Double Hydroxides (LDHs) for CO Oxidation at Ambient Temperature
Source: MDPI journal article supplement (doi:10.3390/catal13081155), 2023-07-26
Supplement: s1 [file s1]

Supporting information

# Au Clusters Supported on Defect-Rich Ni-Ti Oxides Derived from Ultrafine Layered Double Hydroxides (LDHs) for CO Oxidation at Ambient Temperature

Ayu Takahashi <sup>1</sup>, Akihiro Nakayama <sup>1</sup>, Toru Murayama <sup>1,2</sup>, Norihito Sakaguchi <sup>3</sup>, Tetsuya Shimada <sup>1</sup>, Shinsuke Takagi <sup>1</sup> and Tamao Ishida <sup>1,\*</sup>

<sup>1</sup> Department of Applied Chemistry for Environment, Graduate School of Urban Environmental Sciences, Tokyo Metropolitan University, 1-1 Minami-osawa, Hachioji, Tokyo 192-0397, Japan; takahashi-ayu@ed.tmu.ac.jp (A.T.); nakayama-akihiro@ed.tmu.ac.jp (A.N.); murayama@tmu.ac.jp (T.M.); shimada-tetsuya@tmu.ac.jp (T.S.); takagi-shinsuke@tmu.ac.jp (S.T.)

<sup>2</sup> Yantai Key Laboratory of Gold Catalysis and Engineering, Shandong Applied Research Center of Gold Nanotechnology (Au-SDARC), School of Chemistry & Chemical Engineering, Yantai University, 30 Qingquan Road, Yantai 264005, China

<sup>3</sup> Laboratory of Integrated Function Materials, Center for Advanced Research of Energy and Materials, Faculty of Engineering, Hokkaido University, Kita13 Nishi8, Kita-ku, Sapporo, Hokkaido 060-8628, Japan; sakaguchi@eng.hokudai.ac.jp

\* Correspondence: tamao@tmu.ac.jp; Tel.: +81-42-677-2845

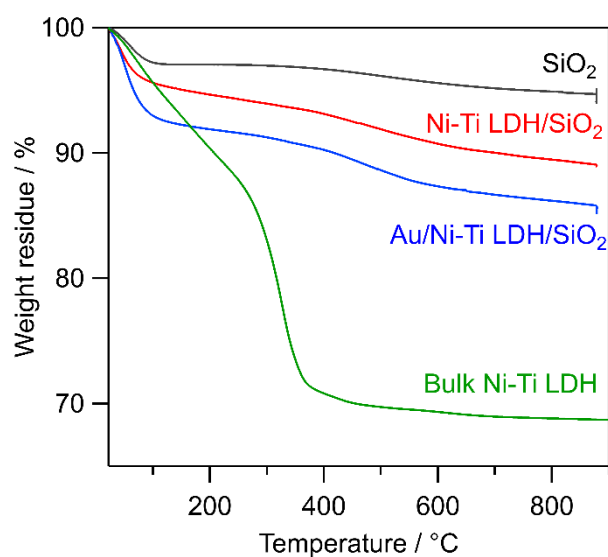

**Figure S1.** TG diagrams of bulk Ni-Ti LDH, Au/Ni-Ti LDH/SiO<sub>2</sub>, Ni-Ti LDH/SiO<sub>2</sub>, and SiO<sub>2</sub>.

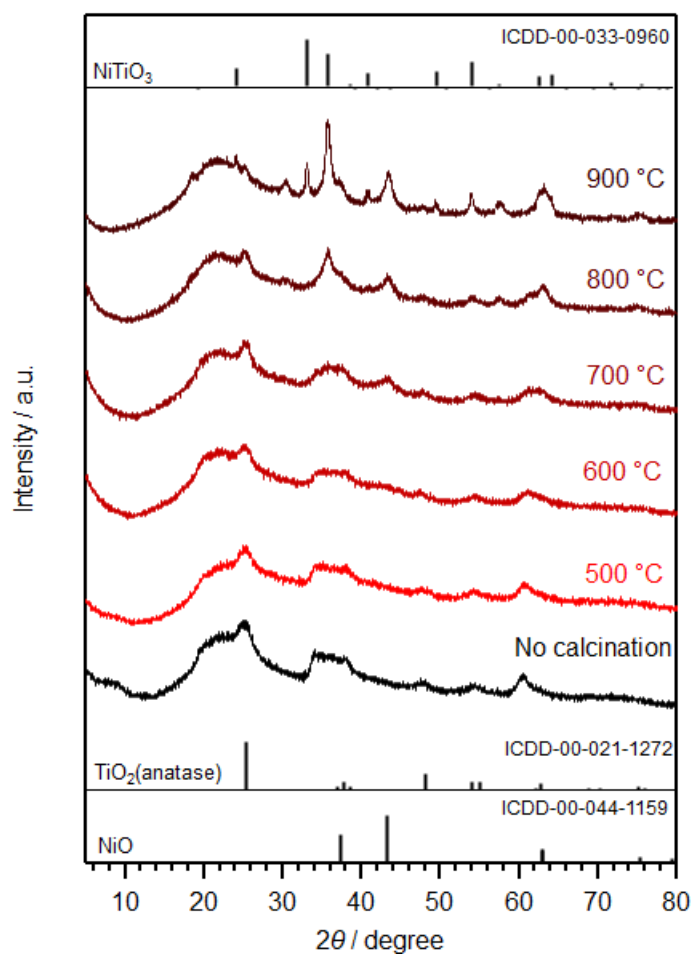

**Figure S2.** XRD patterns of Ni-Ti LDH/SiO<sub>2</sub> calcined at different temperatures with references, NiO, TiO<sub>2</sub> (anatase), and NiTiO<sub>3</sub>.

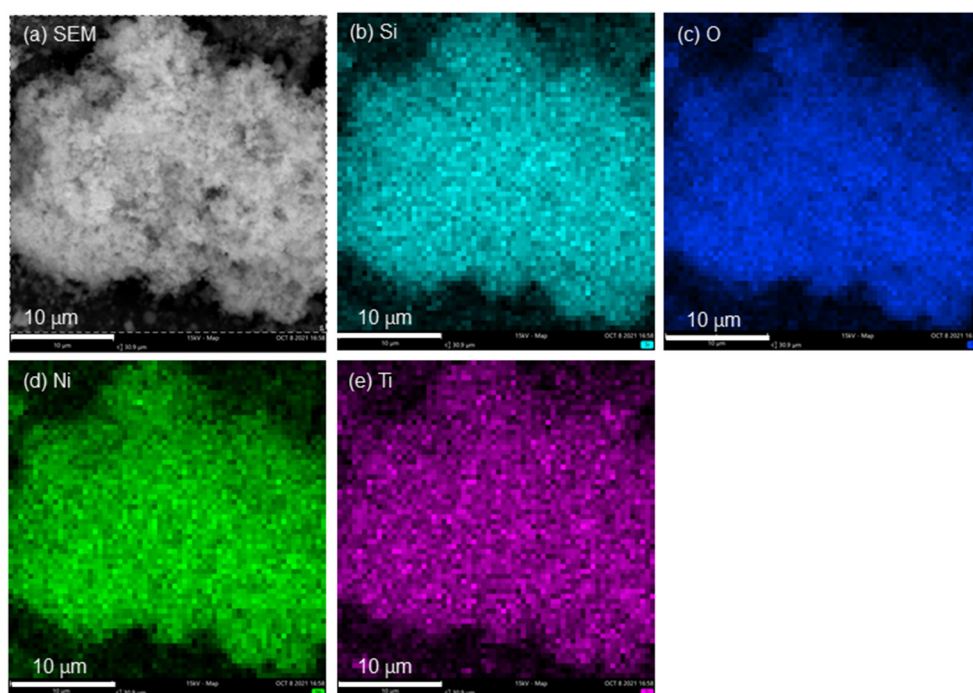

**Figure S3.** SEM-EDS elemental mappings of Ni-Ti LDH/SiO<sub>2</sub>. (a) SEM, (b) Si, (c) O, (d) Ni, and (e) Ti.

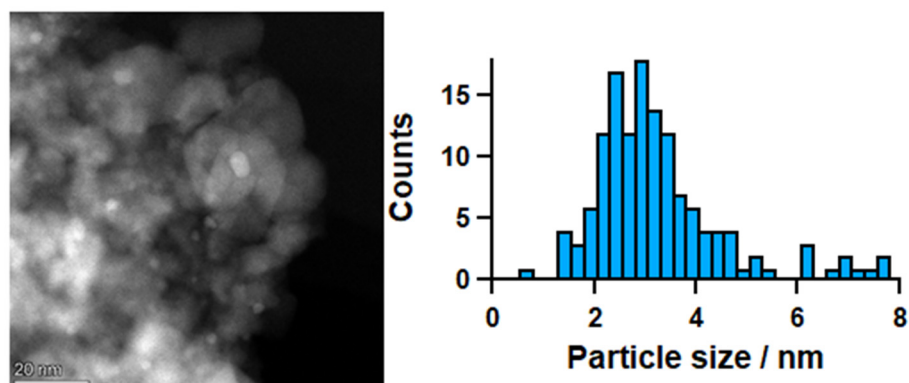

**Figure S4.** TEM image and size distribution of Au particles of Au/bulk Ni-Ti MMO.

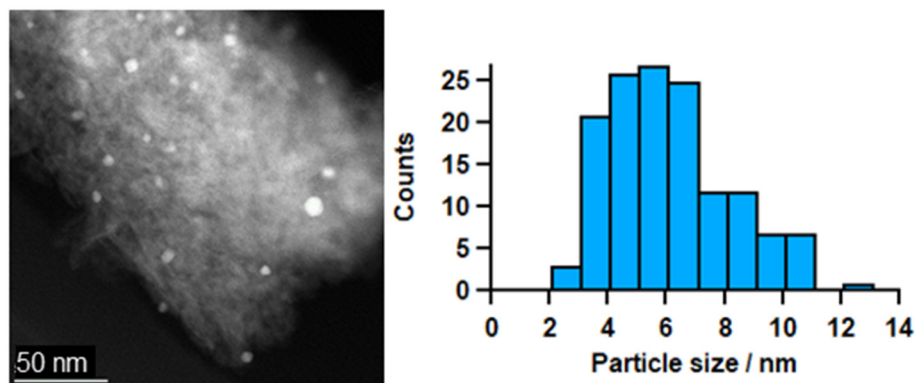

**Figure S5.** TEM image and size distribution of Au particles of Au/Ni-Ti LDH/SiO<sub>2</sub> (Ni/Ti=2/1).

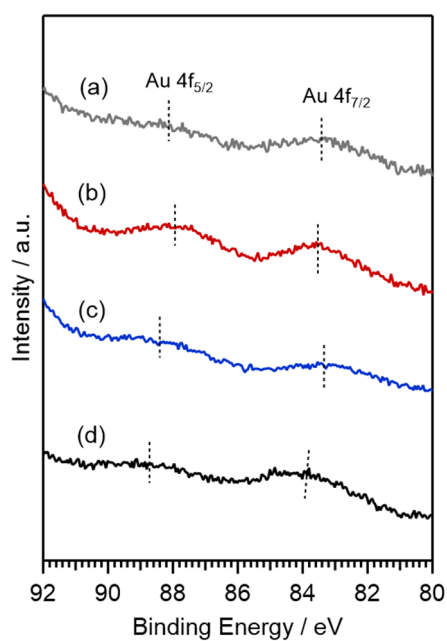

**Figure S6.** Au 4f XPS spectra of Au/Ni-Ti MMO/SiO<sub>2</sub>: (a) LDH-DP, (b) LDH-DPU, (c) MMO-DP, and (d) MMO-DPU.
